# Supplementary material for: Diverse Large HIV-1 Non-subtype B Clusters Are Spreading Among Men Who Have Sex With Men in Spain
Source: Front Microbiol. 2019 Apr 3;10:655. doi: 10.3389/fmicb.2019.00655 (PMC6457325; doi:10.3389/fmicb.2019.00655)
Supplement: Supplementary file 1 [file Table_1.XLSX]

## Sheet: Hoja1
Supplementary Table 1. Epidemiological data of HIV-1 samples collected in Spain for this study
Region	N	Sample collection years	Gender			Transmission route							Country of origin
			M	F	ND	HT	MSM	MSx	PWID	MTCT	Other	ND	Spain	Latin America	Africa	Europe	FSU	Other	ND
Basque Country	4077	2001-2018	2928 (73%)	1073 (27%)	76 (2%)	1209 (32%)	842 (22%)	353 (9%)	1305 (34%)	74 (2%)	18 (0%)	276 (7%)	2855 (76%)	408 (11%)	349 (9%)	97 (3%)	12 (0%)	13 (0%)	343 (8%)
Galicia	3687	1999-2018	2645 (75%)	884 (25%)	158 (4%)	925 (28%)	620 (19%)	195 (6%)	1484 (45%)	26 (1%)	35 (1%)	402 (11%)	2081 (84%)	193 (8%)	86 (3%)	110 (4%)	8 (0%)	2 (0%)	1207 (33%)
Madrid	1311	2004-2018	993 (87%)	144 (13%)	174 (15%)	69 (17%)	255 (63%)	22 (5%)	43 (11%)	8 (2%)	8 (2%)	906 (69%)	376 (65%)	117 (20%)	55 (9%)	21 (4%)	2 (0%)	8 (1%)	732 (56%)
Navarre	347	2011-2018	258 (75%)	88 (25%)	1 (0%)	100 (37%)	98 (36%)	15 (5%)	39 (14%)	9 (3%)	12 (4%)	74 (21%)	210 (61%)	77 (23%)	24 (7%)	25 (7%)	4 (1%)	2 (1%)	5 (1%)
Aragon	268	2011-2018	185 (69%)	82 (31%)	1 (0%)	122 (60%)	49 (24%)	16 (8%)	8 (4%)	9 (4%)	1 (0%)	63 (24%)	164 (63%)	32 (12%)	46 (18%)	10 (4%)	8 (3%)		8 (3%)
Castilla-La Mancha	255	2011-2018	197 (78%)	55 (22%)	3 (1%)	43 (30%)	26 (18%)	44 (31%)	17 (12%)	3 (2%)	8 (6%)	114 (45%)	137 (77%)	22 (12%)	11 (6%)	4 (2%)	2 (1%)	1 (1%)	78 (31%)
La Rioja	248	2007-2018	167 (68%)	77 (32%)	4 (2%)	58 (31%)	17 (9%)	37 (20%)	73 (39%)	1 (1%)	3 (2%)	59 (24%)	174 (77%)	18 (8%)	20 (9%)	12 (5%)	2 (1%)		22 (9%)
Comunidad Valenciana	201	2002-2018	146 (74%)	52 (26%)	3 (2%)	39 (24%)	46 (28%)	6 (4%)	65 (40%)	5 (3%)	2 (1%)	38 (19%)	136 (78%)	24 (14%)	6 (3%)	5 (3%)	2 (1%)	1 (1%)	27 (13%)
Castilla y León	112	2011-2018	93 (84%)	18 (16%)	1 (1%)	23 (30%)	21 (27%)	12 (16%)	17 (22%)	1 (1%)	3 (4%)	35 (31%)	93 (86%)	8 (7%)	2 (2%)	5 (5%)			4 (4%)
Total	10506	1999-2018	7612 (75%)	2473 (25%)	421 (4%)	2587 (30%)	1974 (23%)	701 (8%)	3051 (36%)	136 (2%)	90 (1%)	1967 (19%)	6226 (77%)	899 (11%)	599 (7%)	289 (4%)	40 (0%)	27 (0%)	2426 (23%)
ND: data not available. HT: heterosexual. MSx: male with unspecified sexual transmission. MTCT: mother to child transmission. FSU: former Soviet Union country (all European non-FSU countries of are under 'Europe').
